# Supplementary material for: Chronicling the June conundrum
Source: Springer Nature journal article supplement (doi:10.1007/s10194-011-0365-x), 2011-07-14
Supplement: MOESM1 [file 8768820]

**Electronic Supplementary Material**

|                                                                                                                                                                 |                           |                            |             |                      |
|-----------------------------------------------------------------------------------------------------------------------------------------------------------------|---------------------------|----------------------------|-------------|----------------------|
| <b><i>The Journal of Headache and Pain - 2010</i></b>                                                                                                           |                           |                            |             |                      |
| IF                                                                                                                                                              | Immediacy Index           | Cited Half-life            | Total Cites | Eigenfactor™ Metrics |
| 2.015                                                                                                                                                           | 0.603                     | 3.2                        | 661         | 0.00284              |
| <b>Subject Category <i>Neurosciences</i></b>                                                                                                                    |                           |                            |             |                      |
| Median IF                                                                                                                                                       | Aggregate Immediacy Index | Aggregated Cited-Half-Life | JHP Ranking | Quartile             |
| 2.783                                                                                                                                                           | 0.724                     | 7.2                        | 161/237     | Q3                   |
| <b>Subject Category <i>Clinical Neurology</i></b>                                                                                                               |                           |                            |             |                      |
| Median IF                                                                                                                                                       | Aggregate Immediacy Index | Aggregated Cited-Half-Life | JHP Ranking | Quartile             |
| 1.994                                                                                                                                                           | 0.535                     | 7.0                        | 91/185      | Q2                   |
| <b><math>\Delta</math>IF JHP <u>vs</u> Median IF Neurosciences = -0.768 and <u>vs</u> Median IF Clinical Neurology = +0.021</b>                                 |                           |                            |             |                      |
| Source: Journal Citation Reports (2010 JCR Science Edition) <a href="http://admin-apps.isiknowledge.com/JCR/JCR">http://admin-apps.isiknowledge.com/JCR/JCR</a> |                           |                            |             |                      |
| Accessed, June 30th, 2011                                                                                                                                       |                           |                            |             |                      |
